# Supplementary material
Source: HighWire-hosted journal article supplement (https://gut.bmj.com/content/gutjnl-2022-327913)
Supplement: inline-supplementary-material-2 [file inline-supplementary-material-2.xlsx]

## Sheet: Sheet1
Number	Medical record No.	Gender	Year	Tumor type	Location	Differentiation	TNM stage	Liver metastasis	Date of surgery	Tumor size (maximum diameter, cm)	Disease free survival (month)	Overall survival (month)	Survival status (death = 1 live = 0)	TP53	KRAS	BRAF
1	0157258	male	53	Colorectal Adenocarcinom	Rectum	Moderate	T1N0M0	No	2014/09/29	3.8	60	60	0	mutant	wildtype	wildtype
2	0161114	female	43	Colorectal Adenocarcinom	Rectum	Moderate	T1N0M0	No	2015/01/22	2	60	60	0	wildtype	wildtype	wildtype
3	0161615	female	72	Colorectal Adenocarcinom	Rectum	Moderate	T2N0M0	No	2015/02/05	4.5	60	60	0	mutant	wildtype	wildtype
4	0162521	female	73	Colorectal Adenocarcinom	Rectum	Moderate	T1N0M0	No	2015/03/17	3.4	60	60	0	wildtype	wildtype	wildtype
5	0164904	female	77	Colorectal Adenocarcinom	Rectum	Moderate	T1N0M0	No	2015/05/20	4.2	55	60	0	mutant	mutant	wildtype
6	0164909	male	81	Colorectal Adenocarcinom	Rectum	Moderate	T1N0M0	No	2015/05/20	5.2	60	60	0	wildtype	wildtype	wildtype
7	0165109	female	50	Colorectal Adenocarcinom	Rectum	Moderate	T1N0M0	No	2015/05/26	3	60	60	0	mutant	wildtype	wildtype
8	0162743	male	51	Colorectal Adenocarcinom	Right hemicolon	High	T1N0M0	No	2015/03/23	3	60	60	0	wildtype	mutant	wildtype
9	0168087	female	85	Colorectal Adenocarcinom	Left hemicolon	Moderate	T1N0M0	No	2015/08/20	5.6	60	60	0	wildtype	wildtype	wildtype
10	0169485	male	79	Colorectal Adenocarcinom	Right hemicolon	Moderate	T1N0M0	No	2015/09/30	3	30	36	1	mutant	wildtype	mutant	24.0905
11	0174390	male	78	Colorectal Adenocarcinom	Rectum	Moderate	T2N0M0	No	2016/02/24	5	36	43	1	wildtype	wildtype	wildtype
12	0174585	male	40	Colorectal Adenocarcinom	Rectum	Moderate	T2N0M0	No	2016/03/01	6.1	60	60	0	mutant	wildtype	wildtype
13	0177440	male	73	Colorectal Adenocarcinom	Rectum	Moderate	T2N0M0	No	2016/05/11	6	60	60	0	mutant	mutant	wildtype
14	0178028	female	69	Colorectal Adenocarcinom	Rectum	Moderate	T1N0M0	No	2016/05/24	3	60	60	0	mutant	wildtype	wildtype
15	0179144	male	52	Colorectal Adenocarcinom	Rectum	Low	T2N0M0	No	2016/06/22	3	60	60	0	wildtype	wildtype	wildtype
16	0181424	female	58	Colorectal Adenocarcinom	Rectum	Low	T2N0M0	No	2016/08/17	5	48	52	1	mutant	mutant	wildtype
17	0178424	female	72	Colorectal Adenocarcinom	Left hemicolon	Moderate	T1N0M0	No	2016/06/02	2	55	60	0	wildtype	wildtype	wildtype
18	0148827	female	72	Colorectal Adenocarcinom	Sigmoid colon	Moderate	T2N0M0	No	2013-12-23	5.6	60	60	0	mutant	wildtype	wildtype
19	192373	female	62	Colorectal Adenocarcinom	Sigmoid colon	Low	T1N0M0	No	2017/05/09	3	60	60	0	wildtype	mutant	wildtype
20	0155525	male	45	Colorectal Adenocarcinom	Sigmoid colon	Moderate	T3N0M0	No	2014/08/07	5.2	60	60	0	wildtype	wildtype	wildtype
21	0151684	male	63	Colorectal Adenocarcinom	Left hemicolon	Moderate	T3N0M0	No	2014/04/10	8.6	49	60	0	mutant	mutant	wildtype
22	0152164	male	69	Colorectal Adenocarcinom	Sigmoid colon	Moderate	T3N0M0	No	2014-04-24	3.45	60	60	0	mutant	wildtype	wildtype
23	0152679	male	55	Colorectal Adenocarcinom	Right hemicolon	Moderate	T3N0M0	No	2014/05/09	4	60	60	0	mutant	mutant	wildtype
24	0153415	male	55	Colorectal Adenocarcinom	Sigmoid colon	Moderate	T3N0M0	No	2014/06/03	5.1	60	60	0	wildtype	wildtype	wildtype
25	0149864	male	84	Colorectal Adenocarcinom	Sigmoid colon	Low	T3N0M0	No	2014/01/29	5.6	60	60	0	wildtype	mutant	wildtype
26	0153983	male	90	Colorectal Adenocarcinom	Sigmoid colon	Moderate	T3N0M0	No	2014/06/19	3	60	60	0	mutant	wildtype	wildtype
27	0153616	female	75	Colorectal Adenocarcinom	Sigmoid colon	Moderate	T3N0M0	No	2014/06/09	8.5	48	60	0	mutant	mutant	wildtype
28	0150262	male	60	Colorectal Adenocarcinom	Right hemicolon	Moderate	T3N0M0	No	2014/02/24	3.15	60	60	0	wildtype	wildtype	wildtype
29	0153703	male	86	Colorectal Adenocarcinom	Right hemicolon	Moderate	T3N0M0	No	2014/06/11	3.45	60	60	0	wildtype	wildtype	wildtype
30	0157218	male	77	Colorectal Adenocarcinom	Rectum	Moderate	T3N0M0	No	2014/09/28	2	60	60	0	mutant	mutant	wildtype
31	0155821	male	87	Colorectal Adenocarcinom	Rectum	Low	T3N2M0	No	2014/08/15	3	60	60	0	mutant	wildtype	wildtype
32	0157011	male	57	Colorectal Adenocarcinom	Rectum	Low	T4aN0M0	No	2014/09/23	4	60	60	0	wildtype	wildtype	wildtype
33	0155267	male	74	Colorectal Adenocarcinom	Rectum	Low	T3N0M0	No	2014/07/30	4	34	36	1	wildtype	wildtype	wildtype
34	0149402	male	82	Colorectal Adenocarcinom	Rectum	Low	T3N0M0	No	2014/01/13	6	26	28	1	mutant	wildtype	wildtype
35	0156405	male	78	Colorectal Adenocarcinom	Rectum	Moderate	T4aN0M0	No	2014/09/02	3	60	60	0	mutant	wildtype	wildtype
36	0155230	male	85	Colorectal Adenocarcinom	Rectum	Moderate	T3N0M0	No	2014/07/29	2	60	60	0	mutant	wildtype	wildtype
37	0161410	female	70	Colorectal Adenocarcinom	Rectum	Low	T4aN0M0	No	2015/02/02	3	60	60	0	wildtype	wildtype	wildtype
38	0164133	female	67	Colorectal Adenocarcinom	Rectum	Moderate	T3N0M0	No	2015/04/29	3	33	36	1	mutant	wildtype	wildtype
39	0160788	female	84	Colorectal Adenocarcinom	Right hemicolon	Low	T3N0M0	No	2015/01/14	4	22	25	1	mutant	mutant	wildtype
40	0161029	female	88	Colorectal Adenocarcinom	Sigmoid colon	Low	T3N0M0	No	2015/01/21	3	46	60	0	mutant	mutant	wildtype
41	0161674	female	67	Colorectal Adenocarcinom	Sigmoid colon	Moderate	T3N0M0	No	2015/02/09	3	32	35	1	wildtype	wildtype	wildtype
42	0151733	female	78	Colorectal Adenocarcinom	Right hemicolon	Low	T3N2bM1a	Yes	2014/04/11	4	5	6	1	wildtype	mutant	wildtype
43	0150654	female	88	Colorectal Adenocarcinom	Right hemicolon	Low	T3N0M1a	Yes	2014/03/07	5	15	38	1	mutant	wildtype	wildtype
44	0150048	male	79	Colorectal Adenocarcinom	Sigmoid colon	Moderate	T3N1bM1a	Yes	2014/02/14	3	11	12	1	mutant	mutant	wildtype
45	0154937	female	91	Colorectal Adenocarcinom	Rectum	Low	T4aN0M1	Yes	2014/07/19	3	60	60	0	wildtype	wildtype	wildtype
46	0153984	male	57	Colorectal Adenocarcinom	Rectum	Moderate	T3N0M1a	Yes	2014/06/19	5	60	60	0	mutant	mutant	wildtype
47	0152101	male	80	Colorectal Adenocarcinom	Rectum	Low	T3N0M1a	Yes	2014/04/23	5	60	60	0	wildtype	wildtype	wildtype
48	0165595	female	82	Colorectal Adenocarcinom	Rectum	Moderate	T4aN1bM1a	Yes	2015/06/09	3	60	60	0	mutant	mutant	wildtype
49	0162888	male	64	Colorectal Adenocarcinom	Right hemicolon	Moderate	T3N1aM1a	Yes	2015/03/26	4	23	30	1	mutant	wildtype	wildtype
50	0164277	male	75	Colorectal Adenocarcinom	Sigmoid colon	Moderate	T3N2aM1a	Yes	2015/05/04	3	6	7	1	wildtype	wildtype	wildtype
51	0164404	male	60	Colorectal Adenocarcinom	Left hemicolon	Moderate	T3N1aM1a	Yes	2015/05/06	6	45	60	0	mutant	mutant	wildtype
52	0165478	male	76	Colorectal Adenocarcinom	Sigmoid colon	Low	T3N1bM1a	Yes	2015/06/05	2	15	22	1	wildtype	wildtype	wildtype
53	0169642	male	76	Colorectal Adenocarcinom	Right hemicolon	Moderate	T3N1aM1a	Yes	2015/10/09	3.15	60	60	0	mutant	mutant	wildtype
54	0171019	female	84	Colorectal Adenocarcinom	Sigmoid colon	Moderate	T3N1bM1a	Yes	2015/11/12	2	3	3	1	mutant	wildtype	wildtype
55	0174202	female	54	Colorectal Adenocarcinom	Rectum	Low	T3N1bM1a	Yes	2016/02/17	6	60	60	0	wildtype	mutant	wildtype
56	0178025	male	63	Colorectal Adenocarcinom	Rectum	Moderate	T4N1aM1a	Yes	2016/05/24	3	26	29	1	mutant	wildtype	wildtype
57	0179667	female	68	Colorectal Adenocarcinom	Rectum	Low	T3N1aM1a	Yes	2016/07/06	5	43	48	1	mutant	wildtype	wildtype
58	0174102	male	68	Colorectal Adenocarcinom	Sigmoid colon	Low	T3N1cM1a	Yes	2016/02/05	3	20	28	1	mutant	mutant	wildtype
59	0176173	female	51	Colorectal Adenocarcinom	Right hemicolon	Moderate	T3N1aM1a	Yes	2016/04/11	7	14	24	1	wildtype	wildtype	mutant	36.1841
60	0191849	female	75	Colorectal Adenocarcinom	Sigmoid colon	Moderate	T3N1aM1	Yes	2017/04/27	5	11	18	1	mutant	mutant	wildtype
61	0404905	female	56	Colorectal Adenocarcinom	Right hemicolon	Low	T3N1M1	Yes	2014/03/07	3	43	52	1	wildtype	wildtype	wildtype
62	0527981	female	81	Colorectal Adenocarcinom	Sigmoid colon	Moderate	T4N1M1	Yes	2014/02/14	6	6	11	1	mutant	mutant	wildtype
63	0245496	male	85	Colorectal Adenocarcinom	Sigmoid colon	Low	T4N1cM1a	Yes	2014/07/19	5	60	60	0	mutant	wildtype	wildtype
64	0245981	male	73	Colorectal Adenocarcinom	Sigmoid colon	Moderate	T4N2M1b	Yes	2014/06/19	6	5	19	1	mutant	wildtype	wildtype
65	0174538	female	73	Colorectal Adenocarcinom	Sigmoid colon	Low	T1N1M1b	Yes	2014/04/23	7	6	7	1	mutant	mutant	wildtype
66	0246162	female	84	Colorectal Adenocarcinom	Sigmoid colon	Moderate	T4N1cM1a	Yes	2015/06/09	8.6	5	5	1	wildtype	wildtype	wildtype
67	0246445	male	76	Colorectal Adenocarcinom	Sigmoid colon	Moderate	T4N2M1	Yes	2015/03/26	4	5	6	1	mutant	mutant	wildtype
68	0245509	female	69	Colorectal Adenocarcinom	Right hemicolon	Low	T4N1M1b	Yes	2015/05/04	5	33	38	1	mutant	wildtype	mutant	25.3942
69	0197140	male	73	Colorectal Adenocarcinom	Sigmoid colon	Low	T3N2M1b	Yes	2015/05/06	8	5	15	1	wildtype	mutant	wildtype
70	0243833	male	34	Colorectal Adenocarcinom	Sigmoid colon	Moderate	T4bN2bM1a	Yes	2015/06/05	5.6	23	38	1	mutant	wildtype	wildtype
71	0187303	male	47	Colorectal Adenocarcinom	Sigmoid colon	Low	T4bN2M1	Yes	2015/10/09	5	5	21	1	mutant	mutant	wildtype
72	0209545	female	50	Colorectal Adenocarcinom	Right hemicolon	Low	T4bN1M1	Yes	2016/02/05	3	60	60	0	wildtype	wildtype	mutant	52.0063
73	0222403	male	56	Colorectal Adenocarcinom	Right hemicolon	Low	T4bN1M1	Yes	2016/04/11	3	4	6	1	mutant	mutant	wildtype
74	0254792	male	62	Colorectal Adenocarcinom	Right hemicolon	Low	T4aN1M1	Yes	2017/04/27	3	23	26	1	mutant	mutant	wildtype
75	0239948	female	53	Colorectal Adenocarcinom	Right hemicolon	Moderate	T4bN1M1a	Yes	2015/06/05	8.5	7	9	1	wildtype	wildtype	wildtype
